# Supplementary material for: Long-term effect of Resolvin-D2 on Duchenne muscular dystrophy
Source: Research Square preprint supplement (doi:10.21203/rs.3.rs-6674287/v1), 2025-06-09
Supplement: Supplementary file 1 [file 2a31699fc4477077c405d69e.pdf]

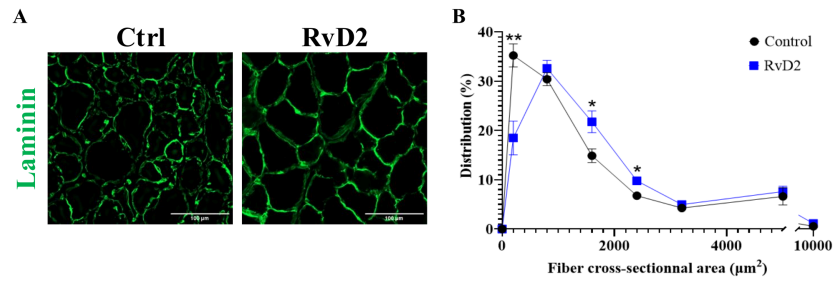

**Supplementary Figure 1. Resolvin-D2 increases fiber size in dystrophic muscles.** Male mdx-DBA/2J were treated with resolvin-d2 (RvD2, 5  $\mu\text{g/kg}$ ) or saline. The tibialis anterior muscle was collected after four weeks to quantify myofiber size. **A)** Immunofluorescence of muscle fibers. **B)** Frequency distribution curve of the myofiber cross-sectional areas. Data are presented as mean  $\pm$  SEM. Means were compared using two-tailed unpaired Student's t-tests. \* $p < 0.05$ , \*\* $p < 0.01$ . n=4-5.

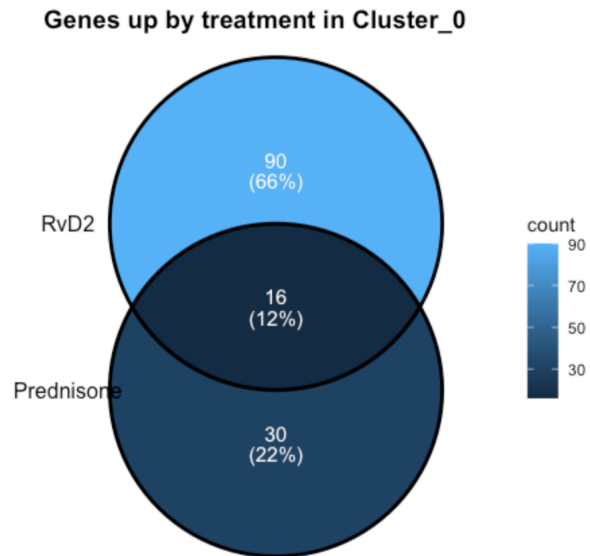

**Supplementary Figure 4. Venn diagram of upregulated genes in anti-inflammatory macrophages (cluster 0).** Male mdx-DBA/2J mice were treated weekly with either resolvin-d2 (RvD2, 5  $\mu$ g/kg), prednisone (2 mg/kg) or vehicle for six months. Macrophages were profiled by scRNAseq.

| Gene           | Forward Sequence      | Reverse Sequence     |
|----------------|-----------------------|----------------------|
| <i>Mrc1</i>    | TGGACACCTCTCAGTGGCTAA | GACACCTGGTTGTAGCAGGT |
| <i>Csflr</i>   | CAGGTGGTGCTGTGTGTGAT  | GGAGTTGTAGCTGCGGAGAA |
| <i>Clec10a</i> | CTGGTGGCTTTGTCATCTGT  | GCTCAGCTCAGGTAGCAGGT |
| <i>Il10rb</i>  | TTGCTGAAGGAGACAGTGGA  | TGGAGAGAGCAGAGAGAGGA |
| <i>Fcgr2b</i>  | GGTGGAGATGAAGGAAGGAG  | TCTTGGCAGGTGATGATGAG |
| <i>Gapdh</i>   | CCCAGAAGACTGTGGATGG   | ACACATTGGGGGTAGGAACA |

**Supplementary Table 1.** List of primers used in qPCR analyses
